# Supplementary material for: The causal effect of inflammatory bowel disease on diffuse large B-cell lymphoma: two-sample Mendelian randomization study
Source: Front Immunol. 2023 Aug 1;14:1171446. doi: 10.3389/fimmu.2023.1171446 (PMC10427854; doi:10.3389/fimmu.2023.1171446)
Supplement: Supplementary file 1 [file Table_1.xls]

## Sheet: S T1
Supplementary Table 1 The baseline characteristics of the selected SNPs in the IBD GWAS
SNP	Position	Chr	β	SE	P-value	EA	OA	EAF	F-statistics
rs7523442	20165971	1	0.124537	0.00990061	2.76439e-36	T	C	0.5356	158.224
rs34856868	92554283	1	-0.195275	0.0340546	9.79873e-09	A	G	0.03159	32.8808
rs72634258	8150638	1	-0.126877	0.0139965	1.24652e-19	C	T	0.1757	82.1726
rs2974935	155181843	1	0.0687256	0.0100715	8.86748e-12	T	G	0.4948	46.5638
rs12411259	172866210	1	0.0669054	0.0115117	6.17504e-09	A	G	0.2401	33.7787
rs3024493	206943968	1	0.196922	0.0131753	1.64778e-50	A	C	0.1572	223.392
rs12103	1247494	1	-0.0867354	0.0130755	3.2802e-11	C	T	0.8166	44.0024
rs7547569	67731368	1	-0.6472	0.0232516	1.65196e-170	C	T	0.06675	774.767
rs2297559	160854526	1	0.0741659	0.0110454	1.88495e-11	A	G	0.6822	45.0864
rs6588248	67652984	1	0.0819867	0.0099185	1.38484e-16	G	T	0.5297	68.3274
rs10800309	161472158	1	-0.132111	0.010405	6.1546e-37	G	A	0.6578	161.211
rs13407913	25097644	2	0.0917072	0.00988181	1.6885e-20	G	A	0.4306	86.1259
rs1517352	191931464	2	0.0778816	0.0102944	3.86545e-14	C	A	0.6048	57.2358
rs6708373	234172846	2	0.134178	0.0099341	1.42561e-41	G	A	0.5277	182.434
rs7608910	61204856	2	0.126444	0.0100484	2.59956e-36	G	A	0.3909	158.344
rs11691685	145481827	2	-0.122467	0.0187977	7.26942e-11	G	A	0.08024	42.4452
rs6745185	241586960	2	0.0698267	0.0115253	1.37322e-09	G	T	0.7389	36.7061
rs780094	27741237	2	-0.0783055	0.00996426	3.88329e-15	C	T	0.6051	61.7582
rs1420098	102984279	2	-0.0952951	0.0102776	1.82516e-20	C	T	0.3877	85.9721
rs72924296	199543967	2	-0.0638392	0.0112629	1.44391e-08	G	A	0.2696	32.1273
rs6740462	65667272	2	0.0799597	0.0116057	5.59114e-12	A	C	0.7378	47.4679
rs1990760	163124051	2	-0.0671151	0.0107006	3.56246e-10	T	C	0.6085	39.3391
rs11677953	219121663	2	0.0790564	0.0100145	2.92213e-15	A	G	0.3969	62.3183
rs35256947	231161026	2	0.0821647	0.0113176	3.87347e-13	C	T	0.2594	52.7062
rs9836291	49697459	3	0.160867	0.0105244	9.61391e-53	A	G	0.2878	233.636
rs11713774	18765978	3	0.0942858	0.0142704	3.91922e-11	C	T	0.1427	43.6536
rs4692386	26132361	4	0.0579752	0.0101746	1.21194e-08	C	T	0.593	32.4676
rs7657746	123161619	4	-0.0868542	0.0118004	1.83485e-13	G	A	0.244	54.1737
rs13107612	102739980	4	0.0732561	0.0108741	1.61994e-11	T	C	0.2969	45.3838
rs974801	106071064	4	-0.0727718	0.0101382	7.07457e-13	G	A	0.3799	51.5234
rs3776414	10689562	5	0.0773716	0.0101613	2.65033e-14	G	T	0.3756	57.9782
rs7711427	40414886	5	0.174764	0.0101797	4.62914e-66	C	A	0.613	294.737
rs4703855	71693899	5	-0.0710611	0.0109034	7.15649e-11	T	C	0.2998	42.4756
rs4976646	176788570	5	0.0730113	0.0104794	3.23445e-12	C	T	0.3415	48.5408
rs79980175	40521892	5	-0.0953162	0.0148313	1.30404e-10	C	A	0.136	41.3024
rs34804116	72539850	5	-0.0574631	0.0104322	3.62402e-08	A	C	0.3867	30.3407
rs181826	141526057	5	0.0820444	0.0104471	4.05229e-15	A	C	0.6266	61.6746
rs1363907	96252803	5	0.0815026	0.0104086	4.86519e-15	A	G	0.4212	61.3138
rs272882	131669161	5	0.166117	0.0108875	1.46656e-52	T	G	0.6733	232.794
rs71593329	158620079	5	-0.0978042	0.0126731	1.18659e-14	G	T	0.1998	59.5593
rs56167332	158827769	5	0.155855	0.0104967	7.16638e-50	A	C	0.3375	220.463
rs6456426	21438889	6	-0.0643405	0.0099028	8.18276e-11	A	C	0.4984	42.2136
rs9264942	31274380	6	0.094692	0.0107773	1.54703e-18	C	T	0.3529	77.1981
rs9273363	32626272	6	-0.193129	0.0120075	3.30217e-58	A	C	0.2748	258.696
rs1847472	90973159	6	-0.0672805	0.0108961	6.62857e-10	A	C	0.3421	38.1273
rs11758694	111948621	6	0.107782	0.0160257	1.74864e-11	A	T	0.09938	45.2333
rs13204742	128245765	6	0.0916208	0.0147604	5.39312e-10	T	G	0.1267	38.5294
rs1267499	14715882	6	0.0821443	0.0125131	5.21555e-11	C	T	0.81	43.0948
rs769177	31547611	6	0.260903	0.0285603	6.5283e-20	T	C	0.02548	83.4512
rs6933404	137959235	6	0.0957518	0.0122643	5.83848e-15	C	T	0.2108	60.9549
rs62434177	138087506	6	-0.179105	0.031375	1.13951e-08	A	G	0.03236	32.5873
rs9457247	167392174	6	0.089151	0.0102086	2.48085e-18	T	C	0.5398	76.2641
rs7773324	382559	6	0.061818	0.0106192	5.83687e-09	A	G	0.6002	33.888
rs2328546	20657345	6	0.0940162	0.0126938	1.29718e-13	C	T	0.8014	54.8557
rs11152949	106449085	6	0.105057	0.0106717	7.2477e-23	G	A	0.3195	96.9132
rs3801835	26852053	7	0.064107	0.0106005	1.47058e-09	T	C	0.3447	36.5728
rs2538470	148220448	7	-0.0675599	0.0101646	2.99916e-11	G	A	0.6378	44.1771
rs1182188	2869985	7	-0.0659028	0.0108086	1.07912e-09	C	T	0.2989	37.1765
rs12718244	50175654	7	0.0761709	0.0100437	3.35274e-14	A	G	0.4081	57.5163
rs2395022	98750379	7	-0.181635	0.0233963	8.26799e-15	C	A	0.95885	60.2705
rs7011507	49129242	8	-0.0846011	0.0150825	2.03222e-08	A	G	0.1233	31.4634
rs7015630	90875918	8	-0.0627799	0.0113167	2.89694e-08	C	T	0.2657	30.7753
rs6651252	129567181	8	-0.0908484	0.014833	9.08239e-10	C	T	0.13	37.5125
rs10758669	4981602	9	-0.148762	0.0102138	4.69894e-48	A	C	0.6504	212.134
rs7848647	117569046	9	0.13239	0.0106897	3.15791e-35	C	T	0.6746	153.384
rs4743820	93928416	9	0.0639523	0.0108526	3.79656e-09	T	C	0.7019	34.7252
rs11793497	139271850	9	0.156206	0.0100484	1.70844e-54	G	A	0.423	241.658
rs34779708	35466185	10	0.106679	0.0102408	2.073e-25	G	T	0.3512	108.515
rs11185982	82305627	10	-0.077882	0.0137863	1.61161e-08	C	T	0.1517	31.9138
rs2497318	94432000	10	-0.0635464	0.00989735	1.35781e-10	T	C	0.4504	41.2234
rs2050392	30691503	10	0.0691178	0.0102921	1.87241e-11	A	G	0.6003	45.0995
rs1250566	81046453	10	-0.100894	0.0110038	4.7698e-20	A	G	0.3161	84.0708
rs2274351	104264107	10	0.0604993	0.0104442	6.93043e-09	T	C	0.5373	33.5545
rs12722515	6081230	10	-0.0989022	0.0142955	4.56773e-12	A	C	0.1627	47.8645
rs2153283	59972299	10	-0.0859637	0.0127458	1.53568e-11	A	C	0.217	45.4879
rs10761659	64445564	10	0.153811	0.0100347	4.9705e-53	G	A	0.5399	234.945
rs2688608	75658349	10	0.062403	0.00988642	2.75467e-10	T	G	0.557	39.8412
rs6584281	101286480	10	-0.164639	0.00992861	9.36268e-62	G	A	0.5188	274.972
rs12796489	3059360	11	-0.760367	0.0432241	2.87276e-69	A	C	0.02286	309.453
rs11230563	60776209	11	-0.081194	0.0105845	1.70608e-14	T	C	0.348	58.8447
rs11236797	76299649	11	0.150864	0.00996698	9.31751e-52	A	C	0.4444	229.11
rs559928	64150370	11	0.094388	0.0129645	3.32583e-13	C	T	0.8128	53.0056
rs648541	114429934	11	-0.0648616	0.0106716	1.21728e-09	G	A	0.3409	36.9416
rs1388585	40531691	12	-0.30489	0.031707	6.8533e-22	A	G	0.98081	92.4647
rs12318183	68503836	12	0.109531	0.01008	1.66994e-27	A	C	0.3854	118.074
rs3184504	111884608	12	-0.0600317	0.00989211	1.28988e-09	C	T	0.5074	36.8284
rs941823	41013977	13	0.0830172	0.0115361	6.18728e-13	C	T	0.7509	51.7867
rs9557207	100036418	13	-0.0878448	0.0120782	3.5156e-13	G	A	0.2231	52.8966
rs12585310	27528347	13	0.0706485	0.0107636	5.24928e-11	A	G	0.3136	43.0815
rs6561151	44484706	13	0.1	0.0118661	3.53346e-17	A	G	0.2235	71.0205
rs1569328	75741751	14	-0.0809722	0.0136766	3.20959e-09	T	C	0.1702	35.0522
rs10142466	69271784	14	-0.0580054	0.010146	1.08365e-08	G	A	0.5065	32.6849
rs55808324	88444752	14	0.141213	0.016844	5.13452e-17	A	G	0.09318	70.2844
rs17293632	67442596	15	0.107165	0.0116106	2.70894e-20	T	C	0.2364	85.1916
rs17651741	38869666	15	0.0702476	0.0126505	2.80892e-08	A	G	0.191	30.8353
rs6500315	50508101	16	0.0766082	0.0118778	1.12065e-10	G	A	0.7753	41.5986
rs62037363	28865042	16	0.0987549	0.0102618	6.36209e-22	C	T	0.3911	92.6126
rs367569	11365500	16	-0.0958166	0.011275	1.92664e-17	T	C	0.2891	72.2185
rs7194886	50725193	16	-0.126026	0.0100135	2.53338e-36	T	C	0.4357	158.398
rs2270395	50846832	16	0.0778411	0.0118554	5.17249e-11	T	C	0.7616	43.1107
rs3853824	54880993	17	0.064031	0.0104099	7.70123e-10	C	T	0.6385	37.8345
rs4795397	38023745	17	0.138343	0.00996661	8.30233e-44	G	A	0.4713	192.672
rs744166	40514201	17	-0.100017	0.0102076	1.14446e-22	G	A	0.4204	96.0064
rs9889296	32570547	17	-0.104999	0.0112854	1.35301e-20	A	G	0.2723	86.5638
rs1292053	57963537	17	0.0701035	0.00982936	9.88781e-13	G	A	0.442	50.8662
rs17780256	70642923	17	-0.083427	0.0125693	3.19374e-11	C	A	0.1927	44.0546
rs7240004	46395022	18	-0.0665215	0.0102898	1.01436e-10	G	A	0.3795	41.7936
rs67643815	67561508	18	-0.0629092	0.0101798	6.41889e-10	T	G	0.5342	38.19
rs2847278	12778715	18	-0.144528	0.0132236	8.32722e-28	T	C	0.841	119.455
rs35164067	10525181	19	-0.11754	0.0127318	2.65705e-20	A	G	0.2039	85.2299
rs7253253	10714058	19	-0.134424	0.02313	6.18586e-09	T	G	0.95432	33.7755
rs2024092	1124031	19	0.106813	0.0121076	1.1246e-18	A	G	0.2162	77.8273
rs17694108	33731551	19	0.0857629	0.0111165	1.21032e-14	A	G	0.2797	59.52
rs516246	49206172	19	0.0755599	0.0101797	1.14842e-13	T	C	0.4652	55.0951
rs6111031	1682037	20	-0.264091	0.0147557	1.23225e-71	T	C	0.1591	320.323
rs913678	48955424	20	-0.0691643	0.0105418	5.34687e-11	C	T	0.3293	43.0462
rs6058869	31348750	20	0.0556615	0.0100037	2.63494e-08	T	C	0.3991	30.9591
rs6074022	44740196	20	-0.0742587	0.0114338	8.32339e-11	T	C	0.7497	42.1807
rs6062496	62329099	20	0.123216	0.0102312	2.10814e-33	A	G	0.5694	145.038
rs259964	57824309	20	-0.0674584	0.00983489	6.92947e-12	G	A	0.5414	47.0471
rs2836883	40466744	21	-0.168413	0.0115451	3.37831e-48	A	G	0.2728	212.792
rs1297258	16806709	21	-0.114524	0.0100654	5.37898e-30	T	C	0.4249	129.459
rs8127691	45614860	21	-0.114259	0.0100818	8.97842e-30	C	T	0.6132	128.441
rs2143178	39660829	22	-0.176684	0.0137017	4.79954e-38	C	T	0.1658	166.282
IBD: inflammatory bowel disease; SNP: single nucleotide polymorphism; Chr: chromosome; β: beta coefficient for effect allele; SE: standard error for effect allele; EA: effect allele; OA: other allele; EA: effect allele frequency.

## Sheet: S T2
Supplementary Table 2 The baseline characteristics of the selected SNPs in the ulcerative colitis GWAS
SNP	Position	Chr	β	SE	P-value	EA	OA	EAF	F-statistics
rs3024493	206943968	1	0.226278	0.0163471	1.41971e-43	A	C	0.1572	191.603
rs111830527	22687173	1	-0.192324	0.0292804	5.08745e-11	A	G	0.05254	43.1433
rs7547569	67731368	1	-0.495701	0.0291648	8.70964e-65	C	T	0.06675	288.883
rs12103	1247494	1	-0.0995588	0.0162944	9.96369e-10	C	T	0.8166	37.3321
rs10910092	2501516	1	-0.0863506	0.0127821	1.42266e-11	G	A	0.4676	45.638
rs35223180	8185902	1	-0.141003	0.0175766	1.0392e-15	T	G	0.1791	64.3557
rs6426833	20171860	1	0.232387	0.0125836	3.77051e-76	A	G	0.536	341.047
rs4656958	160856964	1	0.0824158	0.0138702	2.8167e-09	G	A	0.6821	35.3066
rs1801274	161479745	1	-0.170896	0.012653	1.4345e-41	G	A	0.4958	182.422
rs16841904	197701992	1	0.0860225	0.015305	1.90349e-08	T	C	0.2028	31.5906
rs7608910	61204856	2	0.127099	0.0126851	1.25026e-23	G	A	0.3909	100.391
rs1990760	163124051	2	-0.0855732	0.0134145	1.7809e-10	T	C	0.6085	40.6936
rs13430791	43481013	2	0.105886	0.0186614	1.39422e-08	A	G	0.1202	32.195
rs9941524	199499443	2	0.0977156	0.0127881	2.15278e-14	G	A	0.4559	58.3869
rs10460566	25483121	2	-0.0817673	0.0144699	1.59643e-08	A	G	0.7611	31.9322
rs4973341	228660362	2	0.073473	0.0131405	2.25336e-08	T	C	0.6627	31.2631
rs10185424	102662888	2	-0.0965995	0.0125621	1.47367e-14	G	T	0.5396	59.1324
rs1517352	191931464	2	0.0777839	0.0129859	2.09991e-09	C	A	0.6048	35.8786
rs4676410	241563739	2	0.142022	0.0157426	1.85481e-19	A	G	0.2038	81.3876
rs11676348	219010146	2	0.0744362	0.0124232	2.07678e-09	T	C	0.4763	35.9006
rs9836291	49697459	3	0.170257	0.0132458	8.19785e-38	A	G	0.2878	165.217
rs13136827	123171318	4	-0.111814	0.0176452	2.34542e-10	C	T	0.1622	40.155
rs3774937	103434253	4	0.099276	0.0131621	4.60787e-14	C	T	0.3257	56.8903
rs56167332	158827769	5	0.141368	0.0131737	7.2711e-27	A	C	0.3375	115.156
rs272882	131669161	5	0.145856	0.0138588	6.66807e-26	T	G	0.6733	110.764
rs36070529	158619835	5	-0.091704	0.0160211	1.04073e-08	A	G	0.1999	32.7636
rs4976646	176788570	5	0.0787748	0.0132165	2.51721e-09	C	T	0.3415	35.5256
rs3776414	10689562	5	0.0704798	0.0128464	4.10346e-08	G	T	0.3756	30.1
rs7711427	40414886	5	0.088938	0.0127983	3.67367e-12	C	A	0.613	48.2914
rs7738430	31508836	6	0.367964	0.0340763	3.50913e-27	C	T	0.02624	116.602
rs4947328	31561747	6	0.239455	0.038129	3.38314e-10	G	A	0.02366	39.44
rs9271858	32595223	6	0.122709	0.0129368	2.41769e-21	G	A	0.511	89.9703
rs4712520	20640871	6	0.0929892	0.0166206	2.20841e-08	C	T	0.8182	31.302
rs2516440	31440497	6	-0.0997745	0.0137762	4.40352e-13	A	G	0.3222	52.4542
rs9271255	32580357	6	-0.284959	0.013809	1.31009e-94	T	C	0.732	425.834
rs34659678	111888540	6	0.209947	0.0250948	5.95251e-17	T	C	0.05734	69.9926
rs6920220	138006504	6	0.146936	0.015222	4.77969e-22	A	G	0.2086	93.1779
rs1077773	17442679	7	0.0721282	0.012398	5.96458e-09	A	G	0.5238	33.846
rs12718244	50175654	7	0.0717762	0.0126545	1.4115e-08	A	G	0.4081	32.1715
rs1182188	2869985	7	-0.107615	0.0137507	5.03153e-15	C	T	0.2989	61.2486
rs2395022	98750379	7	-0.183896	0.029166	2.87919e-10	C	A	0.95885	39.7549
rs4728142	128573967	7	0.0969671	0.0126655	1.91823e-14	A	G	0.439	58.6144
rs76546301	50498389	7	0.26496	0.0410174	1.04918e-10	A	G	0.01822	41.7277
rs13255292	129076573	8	-0.075463	0.0137225	3.81514e-08	T	C	0.3284	30.2414
rs4366152	117564875	9	0.120371	0.0135814	7.79471e-19	C	T	0.68	78.5515
rs10758669	4981602	9	-0.143218	0.0128828	1.03753e-28	A	C	0.6504	123.588
rs4743820	93928416	9	0.0809228	0.0137572	4.04772e-09	T	C	0.7019	34.6004
rs10748783	101285872	10	-0.164756	0.0126394	7.73393e-39	A	C	0.5237	169.914
rs2274351	104264107	10	0.0710979	0.0130334	4.89531e-08	T	C	0.5373	29.7576
rs2497318	94432000	10	-0.0714375	0.0125164	1.14641e-08	T	C	0.4504	32.5757
rs4747886	6176166	10	0.0738479	0.0128701	9.58341e-09	T	C	0.4081	32.924
rs59418206	35331624	10	0.0735513	0.012978	1.45001e-08	A	G	0.3508	32.1192
rs10761659	64445564	10	0.117315	0.0126238	1.49796e-20	G	A	0.5399	86.3628
rs12796489	3059360	11	-0.67649	0.0559623	1.21787e-33	A	C	0.02286	146.127
rs61893460	76291154	11	0.121119	0.0125424	4.60363e-22	A	G	0.4447	93.2531
rs11229555	58408687	11	-0.0823351	0.0144507	1.2147e-08	T	G	0.2515	32.4633
rs11230563	60776209	11	-0.0750666	0.0133556	1.90296e-08	T	C	0.348	31.5912
rs661054	114430410	11	-0.124858	0.0135529	3.18273e-20	G	A	0.3408	84.8728
rs483905	96023427	11	0.0849927	0.0135107	3.15929e-10	A	G	0.289	39.5738
rs12318183	68503836	12	0.162178	0.0126604	1.44278e-37	A	C	0.3854	164.093
rs76904798	40614434	12	0.104624	0.0176013	2.77984e-09	T	C	0.1368	35.3324
rs941823	41013977	13	0.108669	0.0146906	1.39155e-13	C	T	0.7509	54.7183
rs55808324	88444752	14	0.127209	0.021035	1.47092e-09	A	G	0.09318	36.5722
rs7404095	23864590	16	0.0717686	0.0126826	1.52416e-08	C	T	0.5796	32.0223
rs79045992	68518992	16	0.118093	0.02083	1.43321e-08	A	G	0.1033	32.1418
rs11150589	30482494	16	-0.0798521	0.0127057	3.28398e-10	C	T	0.5268	39.498
rs11641184	11704651	16	0.0780232	0.0124939	4.24043e-10	A	C	0.4762	38.9988
rs4795397	38023745	17	0.139853	0.012577	1.00624e-28	G	A	0.4713	123.649
rs9891119	40507980	17	-0.0895467	0.0133101	1.72346e-11	C	A	0.3536	45.2623
rs17780256	70642923	17	-0.115389	0.0160316	6.12774e-13	C	A	0.1927	51.8054
rs7240004	46395022	18	-0.0823655	0.0130179	2.49862e-10	G	A	0.3795	40.0321
rs8096327	12887750	18	0.093806	0.0127914	2.24233e-13	G	A	0.3839	53.7805
rs17694108	33731551	19	0.0958444	0.0139396	6.16737e-12	A	G	0.2797	47.2751
rs12720356	10469975	19	0.153279	0.0227683	1.67225e-11	C	A	0.08572	45.3215
rs11083840	47119910	19	0.0691316	0.0125262	3.41036e-08	G	T	0.4025	30.4589
rs6111031	1682037	20	-0.260863	0.0190685	1.33137e-42	T	C	0.1591	187.151
rs6062496	62329099	20	0.113898	0.0128769	9.13903e-19	A	G	0.5694	78.2365
rs913678	48955424	20	-0.0757579	0.013301	1.22914e-08	C	T	0.3293	32.4405
rs4812833	43068996	20	0.103346	0.0125571	1.87068e-16	A	G	0.5188	67.7343
rs1297256	16805676	21	-0.10106	0.0127351	2.09604e-15	T	C	0.4249	62.9729
rs4456788	45616324	21	-0.102758	0.0127344	7.06968e-16	A	G	0.6106	65.114
rs2836883	40466744	21	-0.227134	0.0147424	1.47333e-53	A	G	0.2728	237.371
rs9611131	39662480	22	-0.142696	0.0181548	3.84326e-15	C	T	0.1477	61.779
SNP: single nucleotide polymorphism; Chr: chromosome; β: beta coefficient for effect allele; SE: standard error for effect allele; EA: effect allele; OA: other allele; EA: effect allele frequency.

## Sheet: S T3
Supplementary Table 3 The baseline characteristics of the selected SNPs in the Crohn’s disease GWAS
SNP	Position	Chr	β	SE	P-value	EA	OA	EAF	F-statistics
rs10758669	4981602	9	-0.14975	0.012299	4.18504e-34	A	C	0.6504	148.25
rs10798069	186875459	1	-0.070387	0.0119822	4.24717e-09	T	G	0.4925	34.5074
rs10800309	161472158	1	-0.0904086	0.0126389	8.47813e-13	G	A	0.6578	51.1683
rs11117431	86015316	16	-0.14927	0.0164404	1.09094e-19	G	A	0.1978	82.4366
rs11152949	106449085	6	0.133849	0.0128549	2.17921e-25	G	A	0.3195	108.416
rs11159833	88476004	14	0.155227	0.0207601	7.59277e-14	T	C	0.08681	55.9082
rs11167518	150258920	5	0.279727	0.0198222	3.21144e-45	A	C	0.08143	199.143
rs11185982	82305627	10	-0.109139	0.0168972	1.05412e-10	C	T	0.1517	41.7187
rs11236797	76299649	11	0.180737	0.0120572	8.53886e-51	A	C	0.4444	224.699
rs11691685	145481827	2	-0.157687	0.0233162	1.35176e-11	G	A	0.08024	45.7379
rs11713774	18765978	3	0.132662	0.0171654	1.08868e-14	C	T	0.1427	59.729
rs11768997	50533716	7	0.226326	0.0208449	1.83443e-27	T	G	0.1346	117.888
rs11793497	139271850	9	0.168922	0.0121801	9.80393e-44	G	A	0.423	192.34
rs12411259	172866210	1	0.134364	0.0137443	1.42758e-22	A	G	0.2401	95.5698
rs1250573	81042475	10	-0.141693	0.0134477	5.85733e-26	A	G	0.3155	111.02
rs1267501	14715257	6	0.0871787	0.0151984	9.69059e-09	C	T	0.8106	32.9022
rs12694846	231148128	2	0.115366	0.0136242	2.50092e-17	G	A	0.2593	71.7024
rs12796489	3059360	11	-0.79177	0.0526931	4.95564e-51	A	C	0.02286	225.783
rs1292053	57963537	17	0.0911854	0.0118917	1.74703e-14	G	A	0.442	58.798
rs12949918	40526273	17	-0.104177	0.0123587	3.47376e-17	C	T	0.4185	71.0556
rs1297258	16806709	21	-0.127246	0.0122169	2.10523e-25	T	C	0.4249	108.484
rs13001325	102939036	2	-0.122687	0.0125708	1.67687e-22	T	C	0.3757	95.2514
rs13407913	25097644	2	0.114508	0.0119519	9.63607e-22	G	A	0.4306	91.7905
rs1363907	96252803	5	0.102575	0.0125984	3.89135e-16	A	G	0.4212	66.2906
rs140143	30173109	22	-0.126945	0.013562	7.94511e-21	T	G	0.3897	87.6161
rs1456896	50304461	7	0.0977081	0.0131392	1.03467e-13	T	C	0.6894	55.2998
rs1517352	191931464	2	0.0800097	0.0124517	1.31362e-10	C	A	0.6048	41.2884
rs1569328	75741751	14	-0.109215	0.0167191	6.47441e-11	T	C	0.1702	42.6716
rs1646019	11359680	16	-0.111379	0.013383	8.61787e-17	T	C	0.303	69.2627
rs17129991	67862986	1	-0.284461	0.0450901	2.81365e-10	T	C	0.02246	39.8
rs17293632	67442596	15	0.128384	0.0139602	3.69828e-20	T	C	0.2364	84.5743
rs17391694	78623626	1	-0.119051	0.0199954	2.61818e-09	T	C	0.1226	35.4492
rs17622378	131778452	5	0.190197	0.0120781	7.17133e-56	G	A	0.4186	247.976
rs17694108	33731551	19	0.0795895	0.0134523	3.29018e-09	A	G	0.2797	35.0041
rs181826	141526057	5	0.0995948	0.0127047	4.53419e-15	A	C	0.6266	61.4532
rs1847472	90973159	6	-0.0853854	0.0132299	1.08971e-10	A	C	0.3421	41.6538
rs2024092	1124031	19	0.147664	0.0143378	7.12525e-25	A	G	0.2162	106.068
rs212388	159490436	6	-0.102377	0.0124319	1.79515e-16	T	C	0.6043	67.8156
rs2153283	59972299	10	-0.108804	0.0155227	2.39497e-12	A	C	0.217	49.131
rs2227551	75669190	10	0.0994456	0.0137489	4.72389e-13	T	G	0.7288	52.3161
rs2270395	50846832	16	0.124328	0.0144786	8.92689e-18	T	C	0.7616	73.7369
rs2284553	34776695	21	0.103192	0.0123247	5.626e-17	G	A	0.5904	70.1034
rs2395022	98750379	7	-0.177152	0.0281553	3.1348e-10	C	A	0.95885	39.5888
rs2413583	39659773	22	-0.210407	0.0168361	7.72147e-36	T	C	0.1654	156.184
rs2538470	148220448	7	-0.0749643	0.0122847	1.04597e-09	G	A	0.6378	37.2374
rs259964	57824309	20	-0.0713342	0.0119064	2.08238e-09	G	A	0.5414	35.8951
rs2641348	120437884	1	-0.121336	0.0198422	9.65162e-10	G	A	0.1077	37.3938
rs26528	28517709	16	0.119845	0.0122466	1.2933e-22	C	T	0.4576	95.7654
rs28999107	6493100	12	0.0856594	0.0126539	1.2933e-11	T	G	0.4387	45.8249
rs2974935	155181843	1	0.0755507	0.0121937	5.79522e-10	T	G	0.4948	38.3889
rs3024505	206939904	1	0.165311	0.0159634	3.94548e-25	A	G	0.1573	107.239
rs303429	30708441	10	0.0762756	0.0124275	8.37568e-10	T	C	0.5997	37.6707
rs3129871	32406342	6	-0.087922	0.0130803	1.79556e-11	C	A	0.6601	45.1814
rs3184504	111884608	12	-0.067651	0.0119969	1.71017e-08	C	T	0.5074	31.7988
rs3197999	49721532	3	0.155114	0.0128775	2.05211e-33	A	G	0.2812	145.09
rs34592089	102926923	4	0.199406	0.0249741	1.41059e-15	A	G	0.05297	63.7524
rs34779708	35466185	10	0.134457	0.0123872	1.89714e-27	G	T	0.3512	117.82
rs34787213	60799046	11	-0.14973	0.0183059	2.85496e-16	T	C	0.1401	66.9014
rs34804116	72539850	5	-0.0939086	0.0126747	1.27145e-13	A	C	0.3867	54.8953
rs35164067	10525181	19	-0.143373	0.015563	3.18787e-20	A	G	0.2039	84.8688
rs35320439	242737341	2	0.0840555	0.0137546	9.89464e-10	C	T	0.3104	37.3453
rs36016881	8051241	1	-0.108961	0.0170379	1.60313e-10	G	A	0.1754	40.8987
rs3776414	10689562	5	0.0888353	0.012297	5.04313e-13	G	T	0.3756	52.1883
rs3801810	26892531	7	0.105079	0.01402	6.63285e-14	A	G	0.2337	56.1741
rs3853824	54880993	17	0.0813612	0.0126283	1.17319e-10	C	T	0.6385	41.5093
rs438475	32186245	6	0.159076	0.0172814	3.41507e-20	A	G	0.1322	84.7328
rs4703855	71693899	5	-0.073261	0.0132248	3.03054e-08	T	C	0.2998	30.6879
rs4795397	38023745	17	0.132338	0.0120311	3.83619e-28	G	A	0.4713	120.993
rs516246	49206172	19	0.114576	0.0123121	1.3277e-20	T	C	0.4652	86.601
rs559928	64150370	11	0.099124	0.0158237	3.74524e-10	C	T	0.8128	39.2411
rs56163845	173373948	5	-0.091908	0.0134853	9.3994e-12	G	A	0.3096	46.45
rs6062496	62329099	20	0.120078	0.0124099	3.81593e-22	A	G	0.5694	93.6247
rs6074022	44740196	20	-0.0963211	0.0137745	2.6965e-12	T	C	0.7497	48.898
rs6111031	1682037	20	-0.282366	0.018121	9.60727e-55	T	C	0.1591	242.807
rs61839660	6094697	10	0.148159	0.0203346	3.19227e-13	T	C	0.08983	53.0866
rs640466	34670725	19	-0.0758092	0.0124963	1.30704e-09	C	T	0.3739	36.8028
rs6456426	21438889	6	-0.0991795	0.0119962	1.3671e-16	A	C	0.4984	68.3528
rs6500315	50508101	16	0.145539	0.0146056	2.17721e-23	G	A	0.7753	99.2933
rs6561151	44484706	13	0.147148	0.0142318	4.6752e-25	A	G	0.2235	106.903
rs6651252	129567181	8	-0.149029	0.0183017	3.86011e-16	C	T	0.13	66.3069
rs6679677	114303808	1	-0.185152	0.0220556	4.66659e-17	A	C	0.09755	70.4724
rs6702421	197559324	1	0.110194	0.0141395	6.52529e-15	T	C	0.2255	60.7362
rs6738394	219110625	2	0.0777406	0.011991	8.97635e-11	A	G	0.4519	42.0325
rs6738490	234161583	2	0.226164	0.0120892	4.25794e-78	C	T	0.5274	349.987
rs6740462	65667272	2	0.099737	0.0141387	1.7362e-12	A	C	0.7378	49.7615
rs6827756	123184411	4	-0.0789645	0.0125632	3.27002e-10	C	T	0.6251	39.506
rs6908425	20728731	6	0.103988	0.0150464	4.80839e-12	C	T	0.7843	47.7641
rs7015630	90875918	8	-0.0842498	0.0137523	8.99974e-10	C	T	0.2657	37.5307
rs7085798	101288347	10	-0.174348	0.0120372	1.52651e-47	A	C	0.5176	209.789
rs71624119	55440730	5	-0.0923221	0.0149485	6.574e-10	A	G	0.2422	38.1431
rs7194886	50725193	16	-0.226986	0.0121749	1.4184e-77	T	C	0.4357	347.59
rs7236492	77220616	18	-0.0996611	0.017342	9.09452e-09	T	C	0.1537	33.0258
rs72727394	38847022	15	0.103233	0.0149661	5.28202e-12	T	C	0.2007	47.5795
rs727563	41867377	22	-0.0921252	0.014461	1.88274e-10	T	C	0.7973	40.5845
rs7438704	48363245	4	0.0839019	0.0126601	3.41979e-11	G	A	0.6435	43.9207
rs7517847	67681669	1	-0.335814	0.0124758	1.37721e-159	G	T	0.4352	724.537
rs7608910	61204856	2	0.120609	0.0121405	2.94917e-23	G	A	0.3909	98.693
rs76906269	40607709	12	0.394341	0.0370279	1.74703e-26	G	A	0.01883	113.419
rs7711427	40414886	5	0.24803	0.0124713	5.16535e-88	C	A	0.613	395.535
rs7773324	382559	6	0.078744	0.012909	1.06106e-09	A	G	0.6002	37.2091
rs7786444	28154384	7	0.112085	0.0183382	9.83354e-10	T	C	0.1163	37.3578
rs77981966	43777964	2	0.182656	0.0222451	2.1923e-16	T	C	0.07271	67.4216
rs780094	27741237	2	-0.116483	0.0120611	4.55722e-22	C	T	0.6051	93.272
rs7848647	117569046	9	0.141308	0.0129961	1.54846e-27	C	T	0.6746	118.224
rs7969592	68579649	12	-0.0731898	0.011991	1.03612e-09	G	A	0.4746	37.2555
rs79980175	40521892	5	-0.134258	0.0182147	1.69551e-13	C	A	0.136	54.3296
rs915286	40695992	13	0.066645	0.0119709	2.5875e-08	A	G	0.5488	30.9943
rs9264942	31274380	6	0.150794	0.0128298	6.77798e-32	C	T	0.3529	138.143
rs9457247	167392174	6	0.123663	0.0124045	2.07922e-23	T	C	0.5398	99.385
rs9491892	128280358	6	0.137869	0.0163762	3.80102e-17	G	T	0.1496	70.8773
rs9494844	137983469	6	-0.088944	0.0142376	4.18071e-10	A	C	0.2519	39.0265
rs9554587	100040654	13	-0.0951561	0.0146501	8.28896e-11	G	A	0.2242	42.1883
rs9594766	43040043	13	-0.0735547	0.0121434	1.38526e-09	A	G	0.5294	36.6894
rs9889296	32570547	17	-0.143097	0.0137815	2.95665e-25	A	G	0.2723	107.812
SNP: single nucleotide polymorphism; Chr: chromosome; β: beta coefficient for effect allele; SE: standard error for effect allele; EA: effect allele; OA: other allele; EA: effect allele frequency.

## Sheet: S T4
Supplementary Table 4 The causal effect of IBD on Hodgkin's lymphoma
Exposure	Outcome(Hodgkin's lymphoma)
	MR methods	β	SE	OR(95%CI)	P-value	Cochran’s Q-derived P-value
IBD	MR-Egger	0.046	0.19	1.047(0.722-1.519)	0.809	0.031
	WM	0.034	0.12	1.034(0.817-1.309)	0.779
	IVW	0.047	0.079	1.048(0.898-1.223)	0.551	0.036
Ulcerative colitis	MR-Egger	0.384	0.202	1.468(0.988-2.180)	0.061	0.101
	WM	0.068	0.12	1.071(0.846-1.354)	0.569
	IVW	0.067	0.084	1.069(0.906-1.261)	0.43	0.074
Crohn’s disease	MR-Egger	-0.19	0.18	0.827(0.581-1.178)	0.294	0.081
	WM	-0.102	0.103	0.903(0.737-1.105)	0.322
	IVW	-0.046	0.068	0.955(0.837-1.091)	0.501	0.083
IBD: inflammatory bowel disease; WM: weighted Median; IVW: inverse variance weighted; SE: standard error; OR: odds ratio; 95%CI: 95% confidence interval of OR.

## Sheet: S T5
Supplementary Table 5 The causal effect of IBD on non-Hodgkin's lymphoma(except for diffuse large B-cell lymphoma)
Exposure	Outcome(Follicular lymphoma)						Outcome(Mature T/NK-cell lymphomas)					Outcome(Other and unspecified types of NHL)
	MR methods	β	SE	OR(95%CI)	P-value	Cochran’s Q-derived P-value	β	SE	OR(95%CI)	P-value	Cochran’s Q-derived P-value	β	SE	OR(95%CI)	P-value	Cochran’s Q-derived P-value
IBD	MR-Egger	0.049	0.159	1.051(0.769-1.435)	0.758	0.028	-0.054	0.264	0.947(0.564-1.590)	0.837	0.664	0.119	0.148	1.126(0.842-1.506)	0.425	0.194
	WM	-0.01	0.095	0.990(0.821-1.193)	0.912		-0.062	0.172	0.940(0.670-1.318)	0.719		0.015	0.091	1.016(0.849-1.214)	0.865
	IVW	-0.111	0.067	0.895(0.786-1.020)	0.097	0.026	-0.188	0.11	0.828(0.668-1.028)	0.087	0.68	-0.016	0.062	0.984(0.872-1.111)	0.794	0.193
Ulcerative colitis	MR-Egger	0.084	0.204	1.088(0.730-1.622)	0.681	3.604E-05	0.085	0.315	1.089(0.588-2.017)	0.788	0.101	-0.082	0.174	0.921(0.655-1.295)	0.637	0.037
	WM	0.008	0.101	1.008(0.827-1.229)	0.936		-0.019	0.192	0.981(0.674-1.428)	0.919		0.036	0.099	1.036(0.854-1.258)	0.717
	IVW	-0.025	0.084	0.975(0.827-1.149)	0.762	4.225E-05	-0.22	0.13	0.803(0.622-1.035)	0.09	0.098	0.078	0.072	1.081(0.939-1.244)	0.278	0.036
Crohn’s disease	MR-Egger	0.039	0.149	1.040(0.776-1.394)	0.793	0.12	0.155	0.258	1.168(0.704-1.935)	0.549	0.729	0.109	0.142	1.116(0.845-1.474)	0.443	0.291
	WM	-0.039	0.089	0.961(0.807-1.145)	0.659		0.008	0.154	1.008(0.746-1.362)	0.959		-0.019	0.082	0.981(0.836-1.151)	0.813
	IVW	-0.037	0.056	0.964(0.864-1.076)	0.511	0.129	0.037	0.097	1.038(0.858-1.255)	0.702	0.745	-0.005	0.053	0.995(0.897-1.105)	0.93	0.296
IBD: inflammatory bowel disease; WM: weighted Median; IVW: inverse variance weighted; SE: standard error; OR: odds ratio; 95%CI: 95% confidence interval of OR.
